# Supplementary material for: Seed Rain, Soil Seed Bank, and Seedling Emergence Indicate Limited Potential for Self-Recovery in a Highly Disturbed, Tropical, Mixed Deciduous Forest
Source: Plants (Basel). 2020 Oct 20;9(10):1391. doi: 10.3390/plants9101391 (PMC7589040; doi:10.3390/plants9101391)

## Supplementary materials

### Seed rain, soil seed bank and seedling emergence indicate limited potential for self-recovery in a highly disturbed tropical mixed deciduous forest

Anussara Chalerm Sri<sup>1,2</sup>, La-aw Ampornpan<sup>2</sup>, Witoon Purahong<sup>3</sup>

<sup>1</sup>Prasarnmit demonstration school (Elementary), Faculty of Education, Srinakharinwirot University, Bangkok, 10110, Thailand, <sup>2</sup>Department of Biology, Faculty of Science, Srinakharinwirot University, Bangkok, 10110, Thailand, <sup>3</sup>UFZ-Helmholtz Centre for Environmental Research, Department of Soil Ecology, Theodor-Lieser-Str. 4, D-06120 Halle (Saale), Germany.

**Table S1.** Abundances of seeds from 16 plant species detected in the seed trap at different locations (under tree canopy, bamboo patch and canopy gap).

| Plant species                                           | Tree canopy | Bamboo patch | Canopy gap |
|---------------------------------------------------------|-------------|--------------|------------|
| <i>Bauhinia malabarica</i> Roxb.                        | 1           | -            | -          |
| <i>Canarium subulatum</i> Guill.                        | 5           | 3            | 1          |
| <i>Chromolaena odoratum</i> (L.) R.M.King & H.Rob.      | 11          | 6            | 10         |
| <i>Cratoxylum formosum</i> (Jack) Dyer                  | 1           | 1            | -          |
| <i>Croton roxburghii</i> N.P. Balakr.                   | 1           | -            | 1          |
| <i>Dalbergia</i> sp.                                    | -           | 1            | -          |
| <i>Gardenia sootepensis</i> Hutch.                      | 5           | 2            | 4          |
| <i>Garuga pinnata</i> Roxb.                             | 4           | 1            | 1          |
| <i>Imperata cylindrica</i> (L.) P.Beauv.                | 11          | 2            | 5          |
| <i>Irvingia malayana</i> Oliv.ex A.W.Benn               | 3           | 2            | -          |
| <i>Lagerstroemia</i> (aff. <i>venusta</i> Wall. ex Cl.) | 13          | 6            | 8          |
| <i>Memecylon edule</i> Roxb.                            | 1           | -            | 1          |
| <i>Pennisetum polystachyon</i> Schult                   | 3           | 3            | 2          |
| <i>Pterocarpus macrocarpus</i> Kurz                     | 7           | 5            | 5          |
| <i>Shorea roxburghii</i> G.Don                          | -           | 1            | -          |
| <i>Terminalia triptera</i> Stapf                        | 2           | -            | -          |

**Table S2** Abundances of seedling from 35 plant species detected in soil seed bank (2 sampling times). (C = Climbing plant, H = Herbaceous plant, T = tree, Mono = monocots, Dicot = monocots).

| Plant species                                                  | Family           | Plant group | Soil seed bank (1) | Soil seed bank (2) | Total |
|----------------------------------------------------------------|------------------|-------------|--------------------|--------------------|-------|
| <i>Blumea</i> sp. 1                                            | Asteraceae       | Dicot (H)   | 2                  | 0                  | 2     |
| <i>Blumea</i> sp. 2                                            | Asteraceae       | Dicot (H)   | 3                  | 0                  | 3     |
| <i>Canarium subulatum</i> Guill.                               | Burseraceae      | Dicot (T)   | 7                  | 62                 | 69    |
| <i>Chromolaena odoratum</i> (L.) R.M.King&H.Rob                | Asteraceae       | Dicot (H)   | 15                 | 0                  | 15    |
| <i>Conyza</i> sp.                                              | Asteraceae       | Dicot (H)   | 3                  | 0                  | 3     |
| <i>Croton roxburghii</i> N.P. Balakr.                          | Euphorbiaceae    | Dicot (T)   | 1                  | 0                  | 1     |
| <i>Cyperus</i> sp. 1                                           | Cyperaceae       | Monocot (H) | 5                  | 0                  | 5     |
| <i>Cyperus</i> sp. 2                                           | Cyperaceae       | Monocot (H) | 19                 | 0                  | 19    |
| <i>Cyrtococcum accrescens</i> (Trin.) Stapf                    | Poaceae          | Monocot (H) | 8                  | 0                  | 8     |
| <i>Dioscorea</i> sp.                                           | Dioscoreaceae    | Dicot (C)   | 1                  | 0                  | 1     |
| <i>Entada rheedii</i> Spreng. *                                | Fabaceae         | Dicot (C)   | 0                  | 1                  | 1     |
| <i>Gardenia sootepensis</i> Hutch                              | Rubiaceae        | Dicot (T)   | 7                  | 0                  | 7     |
| <i>Harrisonia perforata</i> (Blanco) Merr.                     | Simaroubaceae    | Dicot (C)   | 1                  | 0                  | 1     |
| <i>Hedyotis ovatifolia</i> Cav.                                | Rubiaceae        | Dicot (H)   | 298                | 0                  | 298   |
| <i>Imperata cylindrica</i> (L.) P.Beauv.                       | Poaceae          | Dicot (H)   | 2                  | 0                  | 2     |
| <i>Irvingia malayana</i> Oliv. ex A.W.Benn *                   | Irvingiaceae     | Dicot (T)   | 0                  | 4                  | 4     |
| <i>Lagerstroemia</i> (aff. <i>venusta</i> Wall. ex Cl.)        | Lythraceae       | Dicot (T)   | 15                 | 0                  | 15    |
| <i>Lindernia ciliata</i> (Colsm.) Pennell                      | Scrophulariaceae | Dicot (H)   | 26                 | 0                  | 26    |
| <i>Lindernia crustacea</i> (L.) F.Muell. var. <i>crustacea</i> | Scrophulariaceae | Dicot (H)   | 20                 | 0                  | 20    |
| <i>Lindernia</i> sp. 1                                         | Scrophulariaceae | Dicot (H)   | 16                 | 0                  | 16    |
| <i>Lindernia</i> sp. 2                                         | Scrophulariaceae | Dicot (H)   | 14                 | 0                  | 14    |
| <i>Melastoma</i> sp.                                           | Melastomataceae  | Dicot (H)   | 1                  | 0                  | 1     |
| <i>Murdannia</i> sp.                                           | Commelinaceae    | Monocot (H) | 5                  | 0                  | 5     |
| <i>Phyllanthus amarus</i> Schumach.&Thonn.                     | Euphorbiaceae    | Dicot (H)   | 89                 | 0                  | 89    |

| Plant species                      | Family           | Plant group | Soil seed<br>bank (1) | Soil seed<br>bank (2) | Total |
|------------------------------------|------------------|-------------|-----------------------|-----------------------|-------|
| <i>Torenia flava</i> Ham. ex Benth | Scrophulariaceae | Dicot (H)   | 14                    | 0                     | 14    |
| <i>Triumfetta</i> sp.              | Tiliaceae        | Dicot (H)   | 2                     | 0                     | 2     |
| unidentified                       | unidentified     | Monocot (H) | 1                     | 0                     | 1     |
| unidentified                       | unidentified     | Dicot (H)   | 1                     | 0                     | 1     |
| unidentified                       | unidentified     | Dicot (H)   | 1                     | 0                     | 1     |
| unidentified                       | unidentified     | Monocot (H) | 8                     | 0                     | 8     |
| unidentified                       | unidentified     | Dicot (H)   | 1                     | 0                     | 1     |
| unidentified                       | unidentified     | Dicot (H)   | 2                     | 0                     | 2     |
| unidentified                       | unidentified     | Monocot (H) | 1                     | 0                     | 1     |
| unidentified                       | unidentified     | Dicot (H)   | 5                     | 0                     | 5     |
| unidentified                       | unidentified     | Dicot (H)   | 1                     | 0                     | 1     |
| Sum                                |                  |             | 595                   | 67                    | 662   |
| Density                            |                  |             | 297.5                 | 33.5                  | 331   |
| SD                                 |                  |             | 51.3                  | 34.39                 | 51.97 |

**Table S3** Plant abundances and species richness detected in soil seed bank experiment.

| Sampling Locations | First soil seed bank sampling               |                                                   | Second soil seed bank sampling              |                                                   |
|--------------------|---------------------------------------------|---------------------------------------------------|---------------------------------------------|---------------------------------------------------|
|                    | Number of tree seedling species (abundance) | Number of herbaceous seedling species (abundance) | Number of tree seedling species (abundance) | Number of herbaceous seedling species (abundance) |
| Tree canopy        | 3 (19)                                      | 25 (250)                                          | 1 (54)*                                     | -                                                 |
| Bamboo patch       | 1 (1)                                       | 14 (102)                                          | 2 (8)                                       | -                                                 |
| Canopy gap         | 2 (10)                                      | 19 (213)                                          | 2 (4)*                                      | 1 (1)                                             |
| Sum                | 4 (30)                                      | 29 (565)                                          | 2 (66)                                      | 1 (1)                                             |

\*One tree seedling species from the second soil seed bank sampling overlapped with the first soil seed bank sampling.

**Table S4.** Correlations among different factors tested in this study. Bold indicates significant values ( $P < 0.05$ ).

|                              |                     | <b>Correlations</b> |                       |                |                       |                      |                              |
|------------------------------|---------------------|---------------------|-----------------------|----------------|-----------------------|----------------------|------------------------------|
|                              |                     | Mortality rate (%)  | Relative humidity (%) | Rain fall (mm) | Soil temperature (°C) | Air temperature (°C) | Light intensity (x1,000 lux) |
| Mortality rate (%)           | Pearson Correlation | 1                   |                       |                |                       |                      |                              |
|                              | Sig. (2-tailed)     |                     |                       |                |                       |                      |                              |
| Relative humidity (%)        | Pearson Correlation | <b>-.917**</b>      | 1                     |                |                       |                      |                              |
|                              | Sig. (2-tailed)     | .000                |                       |                |                       |                      |                              |
| Rain fall (mm)               | Pearson Correlation | <b>-.440*</b>       | <b>.632**</b>         | 1              |                       |                      |                              |
|                              | Sig. (2-tailed)     | .046                | .002                  |                |                       |                      |                              |
| Soil temperature (°C)        | Pearson Correlation | <b>.571**</b>       | <b>-.637**</b>        | <b>-.515*</b>  | 1                     |                      |                              |
|                              | Sig. (2-tailed)     | .007                | .002                  | .017           |                       |                      |                              |
| Air temperature (°C)         | Pearson Correlation | <b>.907**</b>       | <b>-.896**</b>        | -.432          | .362                  | 1                    |                              |
|                              | Sig. (2-tailed)     | .000                | .000                  | .051           | .107                  |                      |                              |
| Light intensity (x1,000 lux) | Pearson Correlation | .057                | .063                  | .390           | <b>-.703**</b>        | .195                 | 1                            |
|                              | Sig. (2-tailed)     | .807                | .785                  | .081           | .000                  | .397                 |                              |

\*\* . Correlation is significant at the 0.01 level (2-tailed).

\* . Correlation is significant at the 0.05 level (2-tailed).

**Table S5.** Partial correlations between mortality rate and air temperature (rain fall, soil temperature and relative humidity were used as control variables). Bold indicates significant values ( $P < 0.05$ ).

| Correlations                                     |                   |                         | Mortality    | Air          | Rain         | Soil         | Relative |
|--------------------------------------------------|-------------------|-------------------------|--------------|--------------|--------------|--------------|----------|
| Control Variables                                |                   |                         | rate         | temperature  | fall         | temperature  | humidity |
| -none- <sup>a</sup>                              | Mortality rate    | Correlation             | 1.000        |              |              |              |          |
|                                                  |                   | Significance (2-tailed) | .            |              |              |              |          |
|                                                  | Air temperature   | Correlation             | <b>.907</b>  | 1.000        |              |              |          |
|                                                  |                   | Significance (2-tailed) | .000         | .            |              |              |          |
|                                                  | Rain fall         | Correlation             | <b>-.440</b> | -.432        | 1.000        |              |          |
|                                                  |                   | Significance (2-tailed) | .046         | .051         | .            |              |          |
|                                                  | Soil temperature  | Correlation             | <b>.571</b>  | .362         | <b>-.515</b> | 1.000        |          |
|                                                  |                   | Significance (2-tailed) | .007         | .107         | .017         | .            |          |
|                                                  | Relative humidity | Correlation             | <b>-.917</b> | <b>-.896</b> | <b>.632</b>  | <b>-.637</b> | 1.000    |
|                                                  |                   | Significance (2-tailed) | .000         | .000         | .002         | .002         | .        |
| Rain fall & Soil temperature & Relative humidity | Mortality rate    | Correlation             | 1.000        | <b>.498</b>  |              |              |          |
|                                                  |                   | Significance (2-tailed) | .            | .035         |              |              |          |

**Table S6** Partial correlations between mortality rate and relative humidity (rain fall, soil temperature and air temperature were used as control variables). Bold indicates significant values ( $P < 0.05$ ).

|                                                |                   |                         | Correlations   |                   |              |                  |                 |
|------------------------------------------------|-------------------|-------------------------|----------------|-------------------|--------------|------------------|-----------------|
| Control Variables                              |                   |                         | Mortality rate | Relative humidity | Rain fall    | Soil temperature | Air temperature |
| -none- <sup>a</sup>                            | Mortality rate    | Correlation             | 1.000          |                   |              |                  |                 |
|                                                |                   | Significance (2-tailed) | .              |                   |              |                  |                 |
|                                                | Relative humidity | Correlation             | <b>-.917</b>   | 1.000             |              |                  |                 |
|                                                |                   | Significance (2-tailed) | .000           | .                 |              |                  |                 |
|                                                | Rain fall         | Correlation             | <b>-.440</b>   | <b>.632</b>       | 1.000        |                  |                 |
|                                                |                   | Significance (2-tailed) | .046           | .002              | .            |                  |                 |
|                                                | Soil temperature  | Correlation             | <b>.571</b>    | <b>-.637</b>      | <b>-.515</b> | 1.000            |                 |
|                                                |                   | Significance (2-tailed) | .007           | .002              | .017         | .                |                 |
|                                                | Air temperature   | Correlation             | <b>.907</b>    | <b>-.896</b>      | -.432        | .362             | 1.000           |
|                                                |                   | Significance (2-tailed) | .000           | .000              | .051         | .107             | .               |
| Rain fall & Soil temperature & Air temperature | Mortality rate    | Correlation             | 1.000          | -.314             |              |                  |                 |
|                                                |                   | Significance (2-tailed) | .              | .204              |              |                  |                 |

**Table S7** Comparisons of number of tree species detected in tree canopy (forest stand) and corresponding number of tree species detected as seed rain/soils seed bank/seedling (and the percentage compared to the canopy) across different tropical forests.

| Forest type and location                                                              | Type of disturbance                                             | Number of species in the canopy/total tree species pool (size, density) | Number of species in seed rain /soils seed bank/seedling (and the percentage compared to the total tree species pool)                                                                                  | Tree seed abundance (seeds month <sup>-1</sup> m <sup>-2</sup> ) | Reference   |
|---------------------------------------------------------------------------------------|-----------------------------------------------------------------|-------------------------------------------------------------------------|--------------------------------------------------------------------------------------------------------------------------------------------------------------------------------------------------------|------------------------------------------------------------------|-------------|
| Tropical Mixed Deciduous Forest, Thailand                                             | Human disturbances (including logging, burning and agriculture) | 56 species (1 ha, 841 individuals per ha.)                              | Seed rain: 13 (23.2%)<br>Soils seed bank: 5 (8.9%)<br>Seedling: 15 (26.8%)                                                                                                                             | 19.57                                                            | This study. |
| Tropical deciduous forest, Mexico                                                     | Human disturbances (including logging, burning and agriculture) | 40* species (1 ha, 1425 individuals per ha.)                            | Seed rain: 18 (57.5%)*                                                                                                                                                                                 | 33.33*                                                           | [1]         |
| Tropical secondary forest, Brazil                                                     | Human disturbances (including logging and burning)              | N.A. (0.7 ha, 1767 individuals per ha.)                                 | Seed rain: 25 (N.A.)<br>Soils seed bank: 12 (N.A.)                                                                                                                                                     | 26.43                                                            | [2]         |
| Tropical secondary forest dominated by bamboo ( <i>Aulonemia aristulata</i> ), Brazil | Human disturbances (including logging and burning)              | N.A. (0.7 ha, 1354 individuals per ha.)                                 | Seed rain: 26 (N.A.)<br>Soils seed bank: 16 (N.A.)                                                                                                                                                     | 21.88                                                            | [2]         |
| Tropical premontane humid forest, Costa Rica                                          | Human disturbances (including forest clearing and agriculture)  | N.A.                                                                    | N.A.                                                                                                                                                                                                   | 89.17                                                            | [3]         |
| Northernmost neotropical rain forest, Mexico (Plot 1, patch age >35 years)            | Preserve area                                                   | 31 species (0.063 ha, 1104 individuals per ha.)                         | Seed rain (all tree species): 36 (116.1%)<br>Seed rain (local tree species): 8 (25.8%)<br><br>Recruited-seedling (all tree species): 15 (48.4%)<br>Recruited-seedling (local tree species): 11 (35.5%) | N.A.                                                             | [4]         |
| Northernmost neotropical rain forest, Mexico (Plot 2, patch age >35 years)            | Preserve area                                                   | 33 species (0.063 ha, 960 individuals per ha.)                          | Seed rain (all tree species): 34 (103%)<br>Seed rain (local tree species): 15 (45.5%)<br><br>Recruited-seedling (all tree species): 15 (48.4%)<br>Recruited-seedling (local tree species): 8 (24.2%)   | N.A.                                                             | [4]         |
| Northernmost neotropical rain forest, Mexico (Plot 3, patch age 20 years)             | Preserve area                                                   | 30 species (0.063 ha, 992 individuals per ha.)                          | Seed rain (all tree species): 34 (113%)<br>Seed rain (local tree species): 15 (50%)                                                                                                                    | N.A.                                                             | [4]         |

| Forest type and location                                                   | Type of disturbance | Number of species in the canopy/total tree species pool (size, density) | Number of species in seed rain /soils seed bank/seedling (and the percentage compared to the total tree species pool)                                                                               | Tree seed abundance (seeds month <sup>-1</sup> m <sup>-2</sup> ) | Reference |
|----------------------------------------------------------------------------|---------------------|-------------------------------------------------------------------------|-----------------------------------------------------------------------------------------------------------------------------------------------------------------------------------------------------|------------------------------------------------------------------|-----------|
|                                                                            |                     |                                                                         | Recruited-seedling (all tree species): 15 (50%)<br>Recruited-seedling (local tree species): 7 (23.3%)                                                                                               |                                                                  |           |
| Northernmost neotropical rain forest, Mexico (Plot 4, patch age >35 years) | Preserve area       | 25 species (0.063 ha, 816 individuals per ha.)                          | Seed rain (all tree species): 33 (132%)<br>Seed rain (local tree species): 16 (64%)<br><br>Recruited-seedling (all tree species): 19 (76%)<br>Recruited-seedling (local tree species): 10 (40%)     | N.A.                                                             | [4]       |
| Northernmost neotropical rain forest, Mexico (Plot 5, patch age 8 years)   | Preserve area       | 31 species (0.063 ha, 1296 individuals per ha.)                         | Seed rain (all tree species): 32 (103.2%)<br>Seed rain (local tree species): 10 (32%)<br><br>Recruited-seedling (all tree species): 8 (25.8%)<br>Recruited-seedling (local tree species): 4 (12.9%) | N.A.                                                             | [4]       |

\* This study includes both tree and shrub species, N.A. = not applicable, all tree species = immigrant tree species and local tree species.

## References

1. Ceccon, E.; Hernández, P. Seed rain dynamics following disturbance exclusion in a secondary tropical dry forest in Morelos, Mexico. *Rev. Biol. Trop.* **2009**, *57*, 257–269.
2. Grombone-Guaratini, M.T.; Alves, L.F.; Vinha, D.; Franco, G.A.D.C. Seed rain in areas with and without bamboo dominance within an urban fragment of the Atlantic Forest. *Acta Bot. Bras.* **2014**, *28*, 76–85, doi:10.1590/S0102-33062014000100008.
3. Reid, J.L.; Holl, K.D.; Zahawi, R.A. Seed dispersal limitations shift over time in tropical forest restoration. *Ecol. Appl.* **2015**, *25*, 1072–1082, doi:10.1890/14-1399.1.
4. Martinez-Ramos, M.; Soto-Castro, A. Seed rain and advanced regeneration in a tropical rain forest. *Vegetatio* **1993**, *107*, 299–318, doi:10.1007/BF00052231.

**Table S8.** Light intensity measured in this study during May, 2004 – January, 2005.

| <b>Month</b> | <b>Light intensity (x1,000 lux)</b> |
|--------------|-------------------------------------|
| May          | 29.9                                |
| June         | 25.5                                |
| July         | 39.0                                |
| August       | 11.5                                |
| September    | 14.8                                |
| October      | 15.1                                |
| November     | 8.5                                 |
| January      | 25.6                                |

**Figure S1** Abundances of seeds from 16 plant species detected in this experiment

(A= *Bauhinia malabarica* Roxb., B= *Canarium subulatum* Guill., C= *Chromolaena odoratum* (L.) R.M.King&H.Rob, D= *Cratoxylum formosum* (Jack) Dyer, E= *Croton roxburghii* N.P. Balakr, F= *Dalbergia* sp., G= *Gardenia sootepensis* Hutch, H= *Garuga pinnata* Roxb, I= *Imperata cylindrica* (L.) P.Beauv, J= *Irvingia malayana* Oliv. ex A.W. Benn, K= *Lagerstroemia* (aff. *venusta* Wall. ex Cl., L= *Memecylon edule* Roxb, M= *Pennisetum polystachyon* Schult, N= *Pterocarpus macrocarpus* Kurz, O= *Shorea roxburghii* G.Don, P= *Terminalia triptera* Stapf)

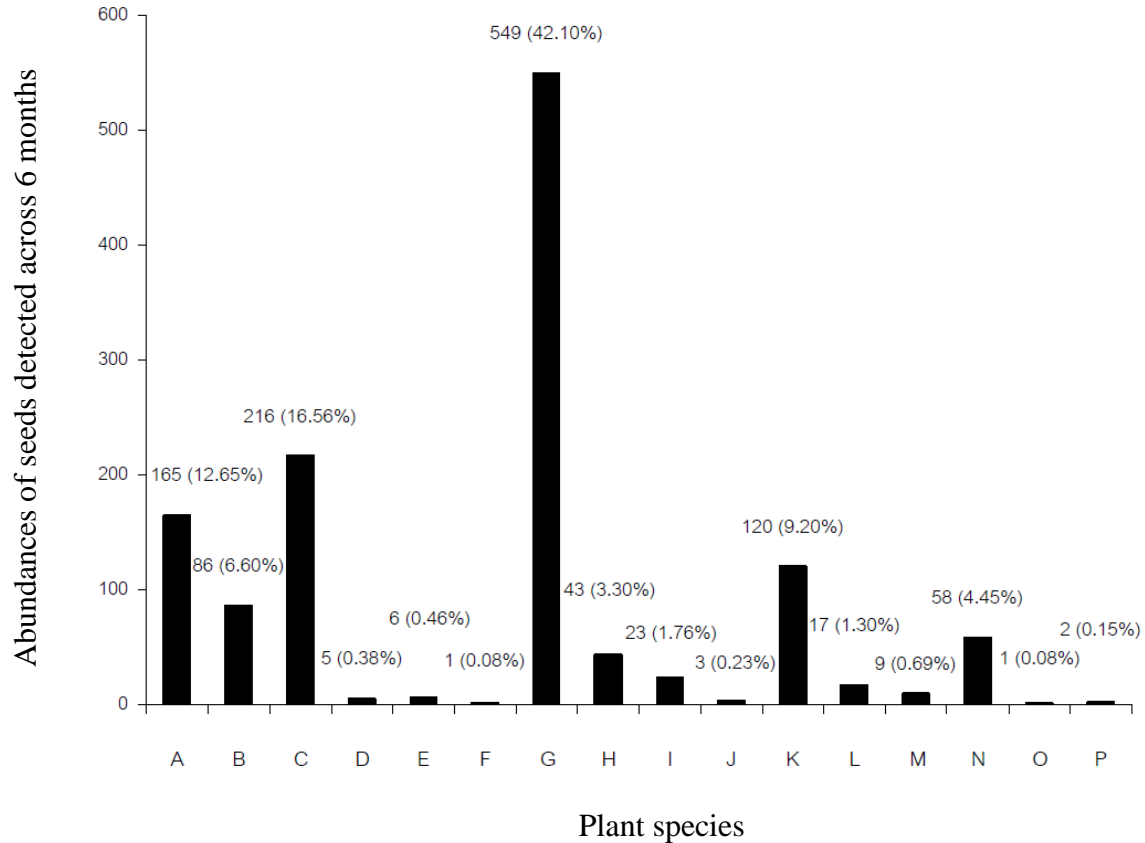

Supplement: Supplementary file 1 [file plants-09-01391-s001.pdf]
